# Supplementary material for: α-Synuclein aggregates amplified from patient-derived Lewy bodies recapitulate Lewy body diseases in mice
Source: PubMed Central journal article supplement (PMC10613245; doi:10.1038/s41467-023-42705-5), 2023-10-28
Supplement: 41467_2023_42705_MOESM1_ESM.pdf [file 41467_2023_42705_MOESM1_ESM.pdf]

**$\alpha$ -Synuclein aggregates amplified from patient-derived Lewy bodies  
recapitulate Lewy body diseases in mice**

Norihito Uemura<sup>1,\*</sup>, Nicholas P. Marotta<sup>1</sup>, Jahan Ara<sup>1</sup>, Emily S. Meymand<sup>1</sup>, Bin Zhang<sup>1</sup>, Hiroshi Kameda<sup>2</sup>, Masato Koike<sup>2</sup>, Kelvin C. Luk<sup>1</sup>, John Q. Trojanowski<sup>1</sup>, Virginia M.-Y. Lee<sup>1,\*</sup>

\*Correspondence: nuemura@kuhp.kyoto-u.ac.jp, vmylee@upenn.edu

**Affiliations**

<sup>1</sup>Department of Pathology and Laboratory Medicine, Institute on Aging and Center for Neurodegenerative Disease Research, University of Pennsylvania School of Medicine, Philadelphia, Pennsylvania, 19104-2676, USA

<sup>2</sup>Department of Cell Biology and Neuroscience, Juntendo University Graduate School of Medicine, Tokyo, Japan

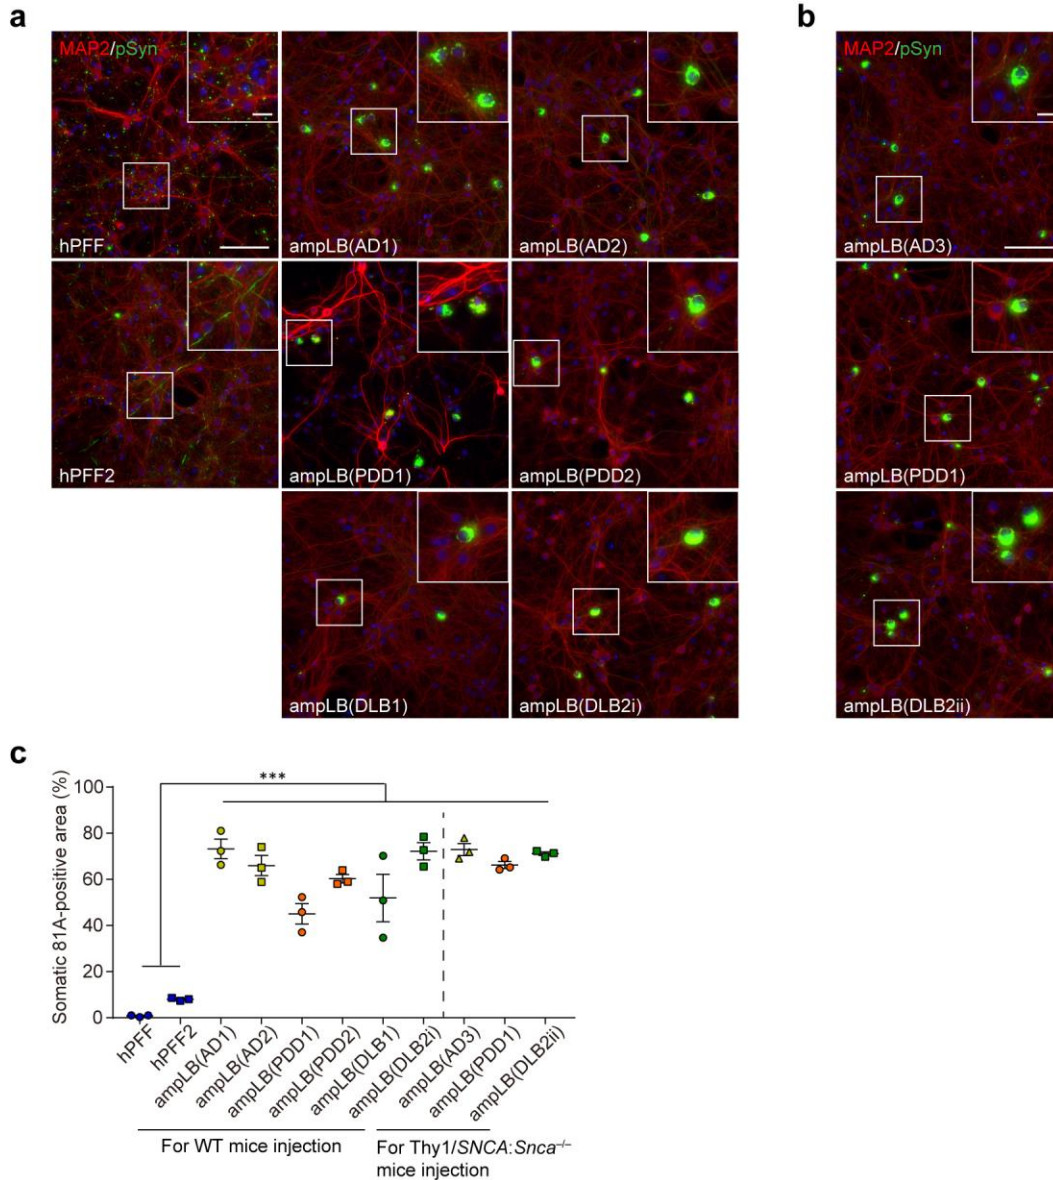

**Supplementary Fig. 1 Validation of LB- $\alpha$ Syn amplification in mouse primary neurons. a, b**

Mouse primary hippocampal neurons treated with hPFF and ampLB preparations. Immunocytochemistry with anti-MAP2 and pSyn (81A) antibodies. Multiple hPFF batches, hPFF used for mouse brain injection and another hPFF batch (hPFF2) were tested. AmpLB preparations used for WT mice injection (**a**) and Thy1:*SNCA*/*Snca*<sup>-/-</sup> mice injection (**b**) were tested. Scale bars 100  $\mu$ m, 20  $\mu$ m (inset). **c** Percent of total pSyn-positive pathology in somatic

inclusions (n = 3 independent wells per group). One-way ANOVA with a Tukey's post-hoc test was performed; hPFF vs. ampLB(AD1), ampLB(AD2), ampLB(PDD1), ampLB(PDD2), ampLB(DLB1), ampLB(DLB2i), ampLB(AD3), ampLB(PDD1), ampLB(DLB2ii)  $p < 0.0001$ ; hPFF2 vs. ampLB(AD1), ampLB(AD2), ampLB(PDD2), ampLB(DLB1), ampLB(DLB2i), ampLB(AD3), ampLB(PDD1), ampLB(DLB2ii)  $p < 0.0001$ ; hPFF2 vs. ampLB(PDD1)  $p = 0.001$ ). Data are represented as mean  $\pm$  SEM. Source data are provided as a Source Data file.

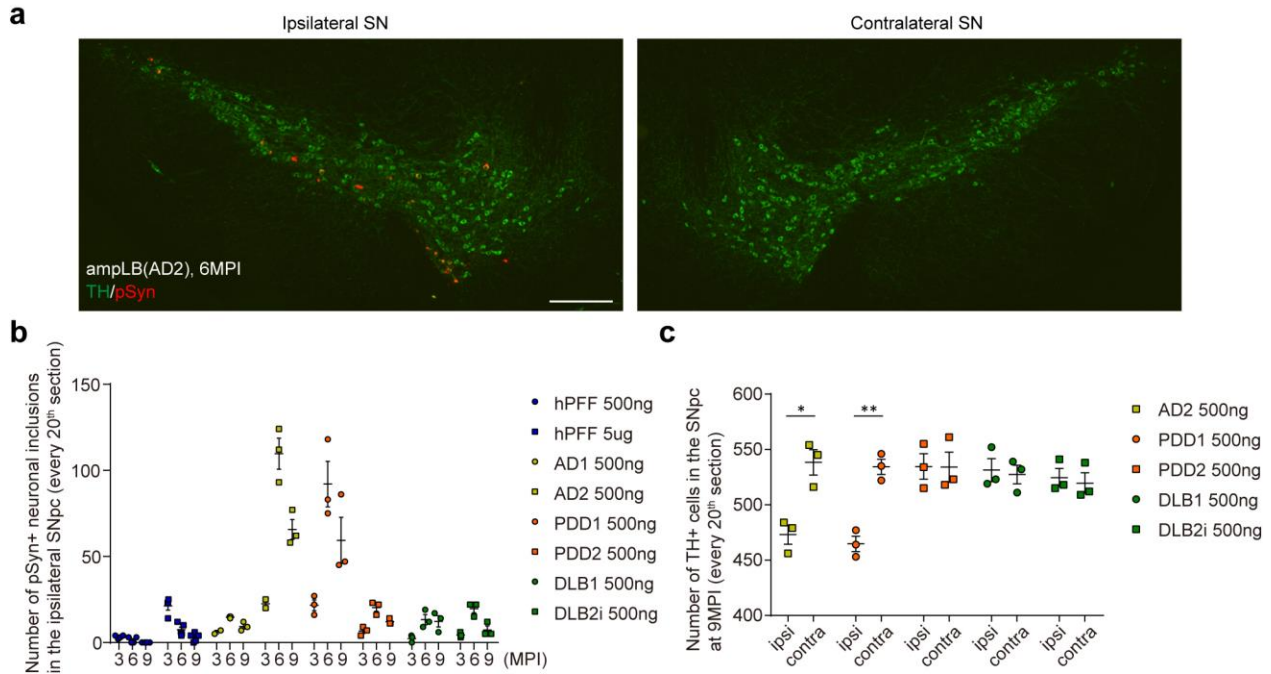

**Supplementary Fig. 2  $\alpha$ Syn pathology in the SNpc of ampLB-injected WT mice.** **a** Double immunofluorescence for tyrosine hydroxylase (TH, green) and pSyn (EP1536Y, red) in the SN of ampLB-injected mice at 6MPI. Scale bar 200  $\mu$ m. **b** Number of pSyn-positive neuronal inclusions in the SNpc (hPFF 500 ng, n = 4; hPFF 5 $\mu$ g, n = 4, 5, 5; AD1, AD2 500 ng, n = 2, 3, 3; PDD1, PDD2, DLB1, DLB2i 500 ng, n = 3 biologically independent samples). **c** Number of TH-positive cells in the ipsilateral (ipsi) and contralateral (contra) SNpc at 9MPI (n = 3 biologically independent samples per group). A two-tailed unpaired Student's *t*-test was performed between the ipsilateral and contralateral sides for each group (AD2 500 ng  $p = 0.0104$ ; PDD1 500 ng  $p = 0.0021$ ). Data are represented as mean  $\pm$  SEM. Source data are provided as a Source Data file.

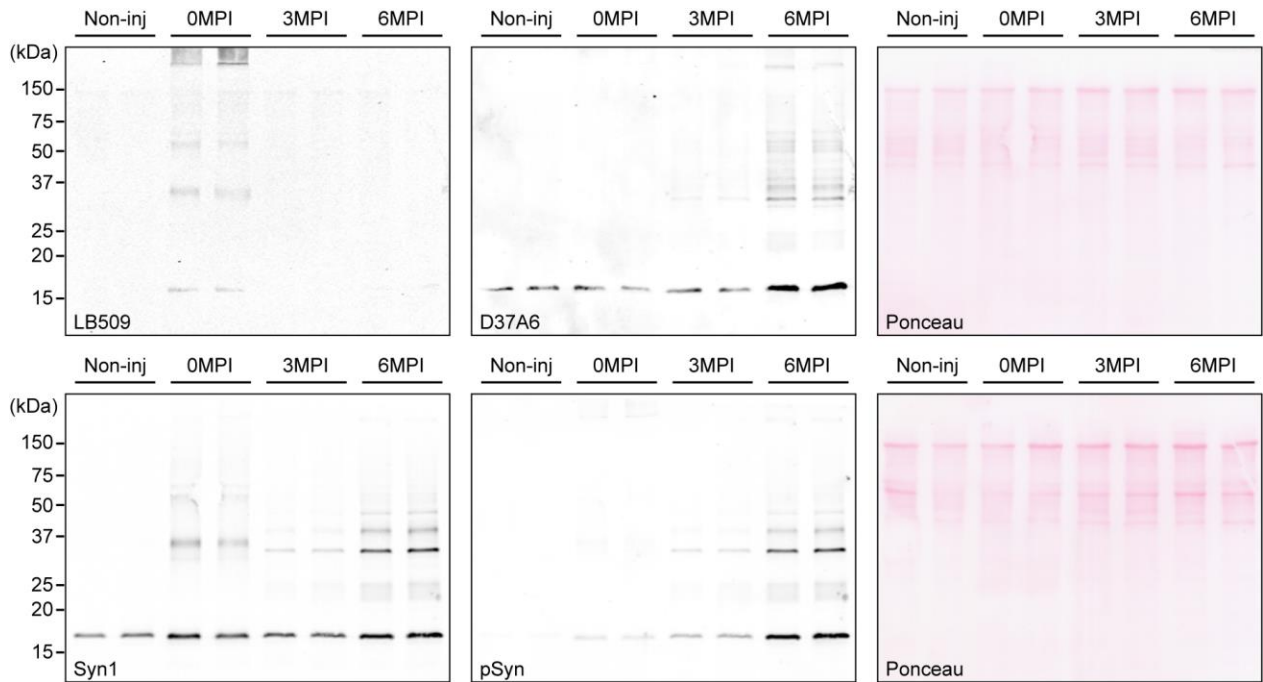

**Supplementary Fig. 3 Biochemical analysis of ampLB-injected WT mouse brains.** Western blot analysis of sarkosyl-insoluble brain lysates of non-injected mice (Non-inj), ampLB (DLB2i)-injected mice at 0MPI (just after injection), 3MPI, and 6MPI. Immunoblots with anti- $\alpha$ Syn antibodies LB509 (human  $\alpha$ Syn), D37A6 (mouse  $\alpha$ Syn), and Syn1 (human + mouse  $\alpha$ Syn), and an anti-pSyn antibody EP1536Y. Images are representative of two independent experiments. Source data are provided as a Source Data file.

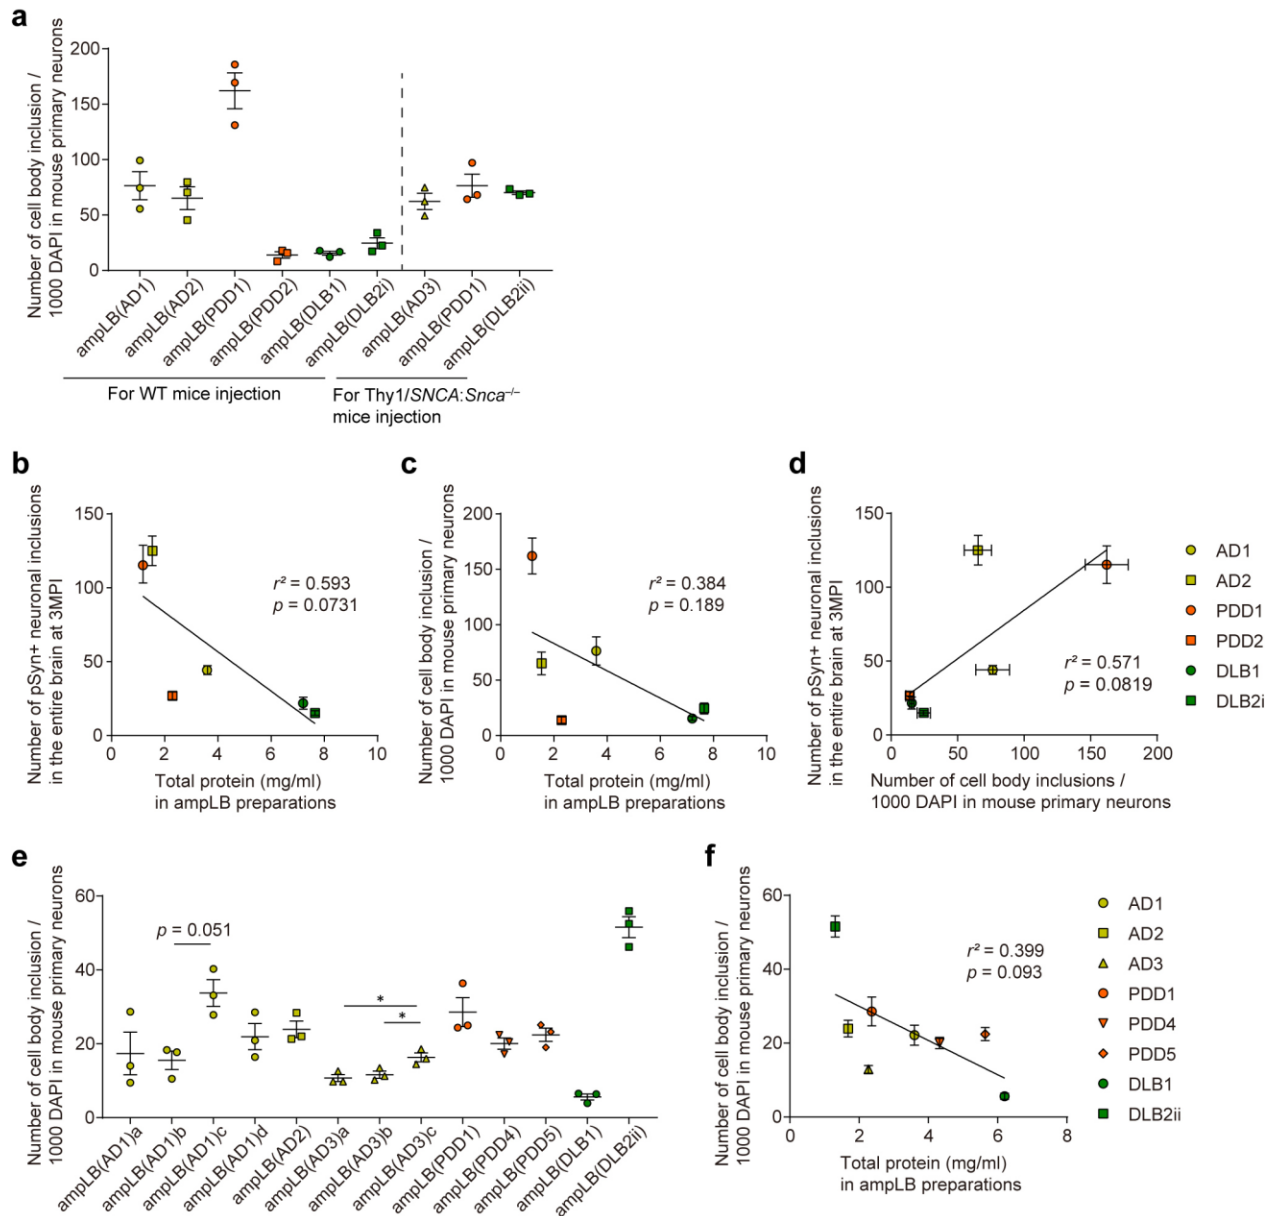

**Supplementary Fig. 4 Correlation among *in vivo* and *in vitro* seeding activity and total protein of ampLB preparations.** **a** Number of pSyn-positive cell body inclusions per 1,000 DAPI-positive nuclei in mouse primary hippocampal neurons treated with ampLB in Fig. S1 ( $n = 3$  independent wells per group). **b** Correlation between number of pSyn-positive neuronal inclusions in the entire brains of ampLB-injected mice at 3MPI (AD1, AD2,  $n = 2$ ; PDD1, PDD2, DLB1, DLB2i,  $n = 3$  biologically independent samples) and total protein in ampLB preparations

( $r^2 = 0.593$ ,  $p = 0.0731$ ). **c** Correlation between number of pSyn-positive cell body inclusions per 1,000 DAPI-positive nuclei in mouse primary hippocampal neurons treated with ampLB (n = 3 independent wells per group) and total protein in ampLB preparations ( $r^2 = 0.384$ ,  $p = 0.189$ ). **d** Correlation between number of pSyn-positive neuronal inclusions in the entire brains of ampLB-injected mice at 3MPI and number of pSyn-positive cell body inclusions per 1,000 DAPI-positive nuclei in mouse primary hippocampal neurons treated with ampLB ( $r^2 = 0.572$ ,  $p = 0.0819$ ). **e** Number of pSyn-positive cell body inclusions per 1,000 DAPI-positive nuclei in mouse primary hippocampal neurons treated with an independent batch of ampLB preparations (n = 3 independent wells per group). The ampLB(AD1)a–d and ampLB(AD3)a–c preparations were generated from the same brain lysates. One-way ANOVA with a Tukey’s post-hoc test was performed among the ampLB(AD1) and ampLB(AD3) preparations (ampLB(AD1)b vs. ampLB(AD1)c  $p = 0.0508$ ; ampLB(AD3)a, ampLB(AD3)b vs. ampLB(AD3)c  $p = 0.0206$ ,  $0.0428$ ). **f** Correlation between number of pSyn-positive cell body inclusions per 1,000 DAPI-positive nuclei in mouse primary hippocampal neurons treated with ampLB (AD1, n = 12; AD3, n = 9; AD2, PDD1, PDD4, PDD5, DLB1, DLB2ii, n = 3 independent wells) and total protein in ampLB preparations ( $r^2 = 0.399$ ,  $p = 0.093$ ). Data are represented as mean  $\pm$  SEM. Source data are provided as a Source Data file.

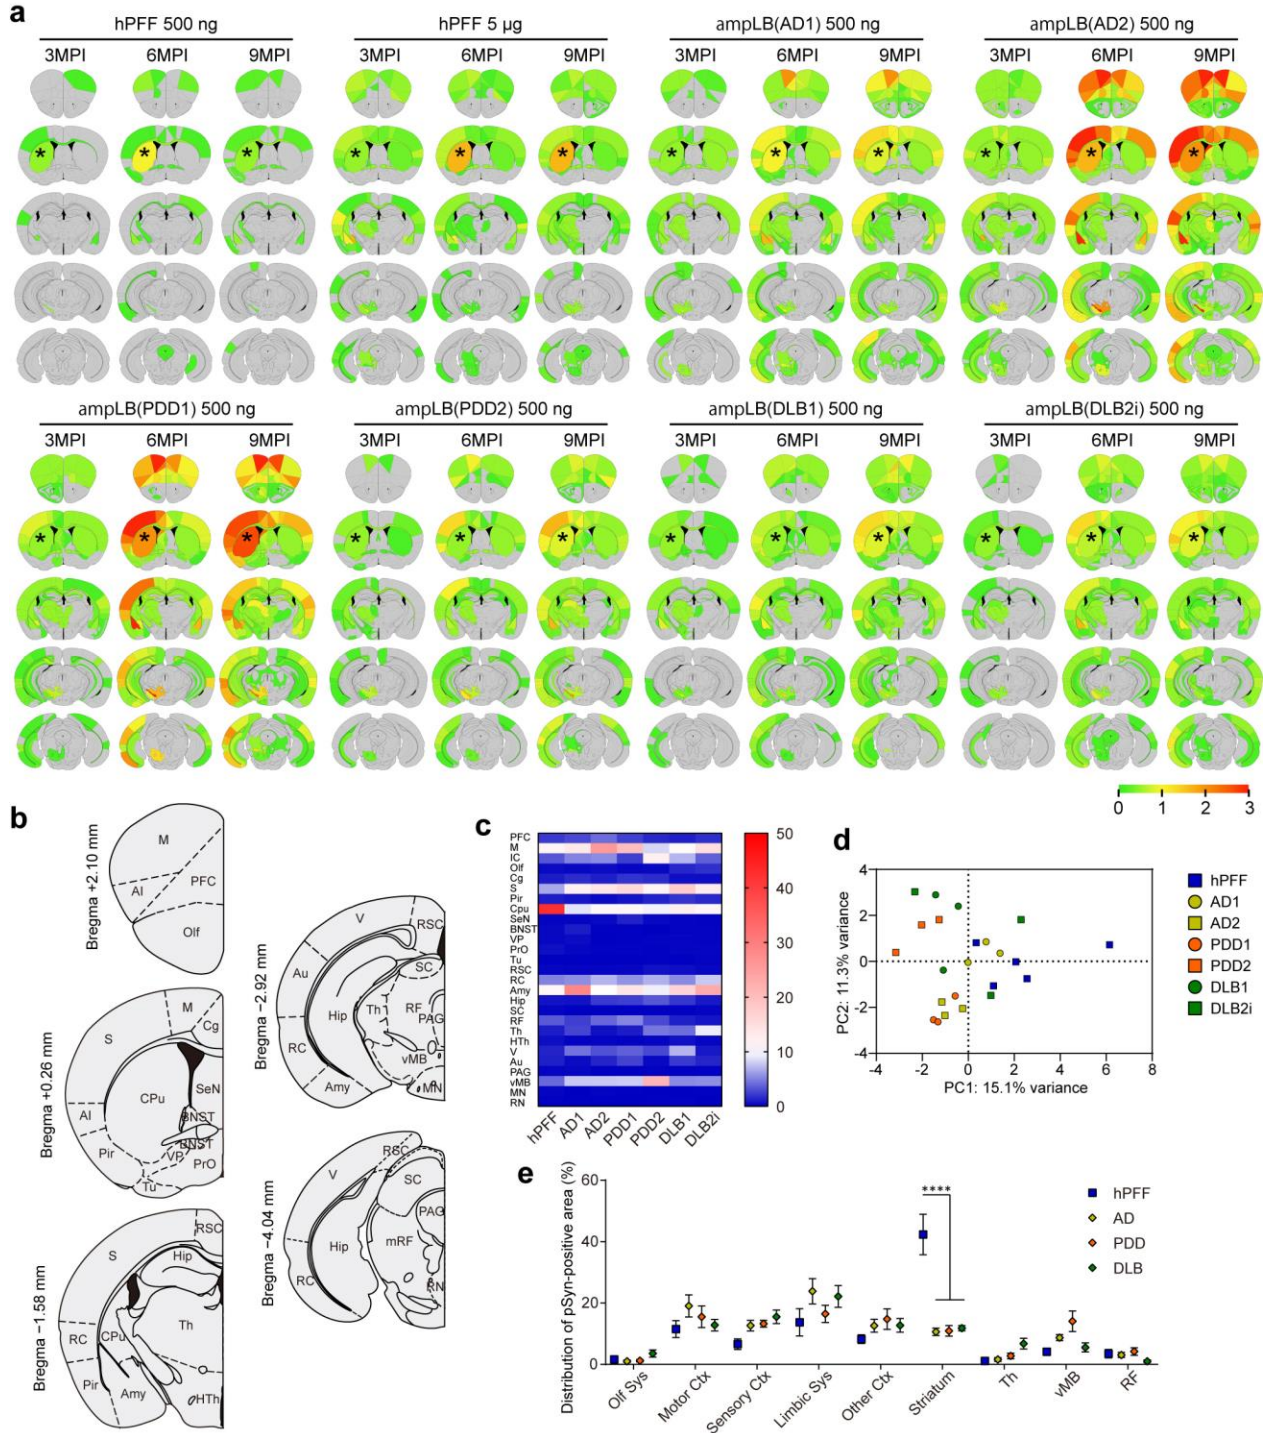

**Supplementary Fig. 5 Differences in distribution of  $\alpha$ Syn pathology between hPFF and ampLB in WT mice.** **a** Heat map colors represent extent of pSyn-positive pathology. **b** Classification of brain regions for quantitative analyses of pSyn-positive area. **c** Heat map colors



represent proportion of pSyn-positive area in each brain region shown in [Fig. 5b](#) at 6MPI. **d** Primary component analysis of the distribution of pSyn-positive pathology at 6MPI (hPFF,  $n = 5$ ; AD1, AD2, PDD1, PDD2, DLB1, DLB2,  $n = 3$  biologically independent samples). **e** Distribution of pSyn-positive pathology in the brain systems (hPFF,  $n = 5$ ; AD, PDD, DLB,  $n = 6$  biologically independent samples). Olf Sys, olfactory system; Motor Ctx, motor cortex; Sensory Ctx, sensory cortex; Limbic Sys, limbic system; Th, thalamus; vMB, ventral midbrain; RF, reticular formation. Two-way ANOVA with a Sidak's post-hoc test was performed (interaction  $p < 0.0001$ , hPFF vs. AD, PDD, DLB  $p < 0.0001$ ). Data are represented as mean  $\pm$  SEM. Source data are provided as a Source Data file.

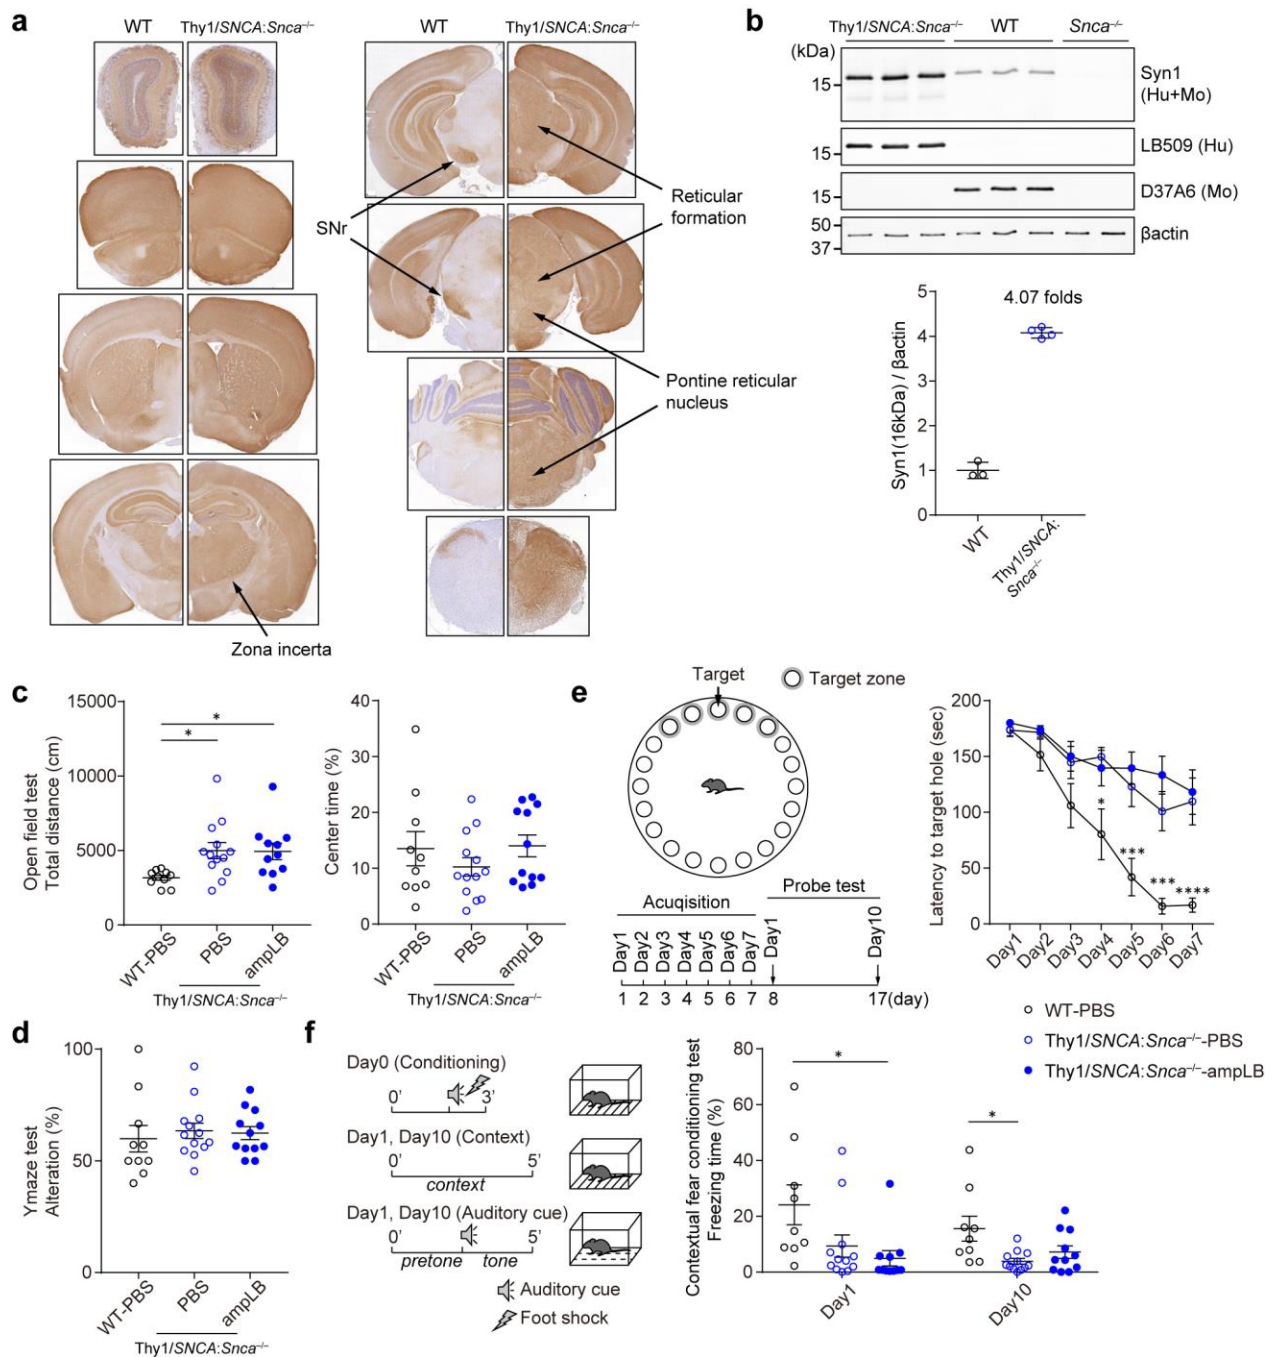

**Supplementary Fig. 6 Modeling LBDs in Thy1:SNCA/Snca<sup>-/-</sup> mice.** **a** Immunohistochemistry with an anti- $\alpha$ Syn antibody (Syn1). SNr, substantia nigra reticulata. **b** Upper panel: Western blot analysis of Triton X-soluble brain lysates of Thy1:SNCA/Snca<sup>-/-</sup> mice, WT mice, and Snca<sup>-/-</sup> mice with anti- $\alpha$ Syn (Syn1 [human and mouse  $\alpha$ Syn], LB509 [human  $\alpha$ Syn], and D37A6 [mouse  $\alpha$ Syn]) and  $\beta$ actin antibodies. Lower panel: quantification of Syn1 (16kDa) bands normalized by

$\beta$ actin bands (WT, n = 3; Thy1:*SNCA/Snca*<sup>-/-</sup>, n = 4 biologically independent samples). **c** Open field test at 7MPI (WT-PBS, n = 10; Thy1:*SNCA/Snca*<sup>-/-</sup>-PBS, n = 13; Thy1:*SNCA/Snca*<sup>-/-</sup>-ampLB, n = 11 biologically independent samples). Left panel: Total distance traveled. One-way ANOVA with a Tukey's post-hoc test was performed (WT-PBS vs. Thy1:*SNCA/Snca*<sup>-/-</sup>-PBS, Thy1:*SNCA/Snca*<sup>-/-</sup>-ampLB  $p = 0.0291, 0.0434$ ). Right panel: Time spent in center area. **d** Y maze test at 7MPI (WT-PBS, n = 10; Thy1:*SNCA/Snca*<sup>-/-</sup>-PBS, n = 13; Thy1:*SNCA/Snca*<sup>-/-</sup>-ampLB, n = 11 biologically independent samples). **e** Barnes maze test at 7MPI (WT-PBS, n = 10; Thy1:*SNCA/Snca*<sup>-/-</sup>-PBS, n = 12; Thy1:*SNCA/Snca*<sup>-/-</sup>-ampLB, n = 11 biologically independent samples). Left panel: Schematic representation of experimental design. Right panel: Latency to target hole in acquisition trials. Two-way repeated measures ANOVA with a Tukey's post-hoc test was performed for day (interaction  $p < 0.0001$ , Day4: WT-PBS vs. Thy1:*SNCA/Snca*<sup>-/-</sup>-PBS, Thy1:*SNCA/Snca*<sup>-/-</sup>-ampLB  $p = 0.0021, 0.0123$ ; Day5: WT-PBS vs. Thy1:*SNCA/Snca*<sup>-/-</sup>-PBS, Thy1:*SNCA/Snca*<sup>-/-</sup>-ampLB  $p = 0.0002, < 0.0001$ ; Day6: WT-PBS vs. Thy1:*SNCA/Snca*<sup>-/-</sup>-PBS, Thy1:*SNCA/Snca*<sup>-/-</sup>-ampLB  $p = 0.0001, < 0.0001$ ; Day7: WT-PBS vs. Thy1:*SNCA/Snca*<sup>-/-</sup>-PBS, Thy1:*SNCA/Snca*<sup>-/-</sup>-ampLB  $p < 0.0001$ ). **f** Fear conditioning test at 8MPI (WT-PBS, n = 9; Thy1:*SNCA/Snca*<sup>-/-</sup>-PBS, n = 12; Thy1:*SNCA/Snca*<sup>-/-</sup>-ampLB, n = 11 biologically independent samples). Left panel: Schematic representation of experimental design. Right panel: Freezing time in a contextual fear conditioning test. One-way ANOVA with a Tukey's post-hoc test was performed (Day1: WT-PBS vs. Thy1:*SNCA/Snca*<sup>-/-</sup>-ampLB  $p = 0.0220$ ; Day10: WT-PBS vs. Thy1:*SNCA/Snca*<sup>-/-</sup>-PBS  $p = 0.0118$ ). Source data are provided as a Source Data file.

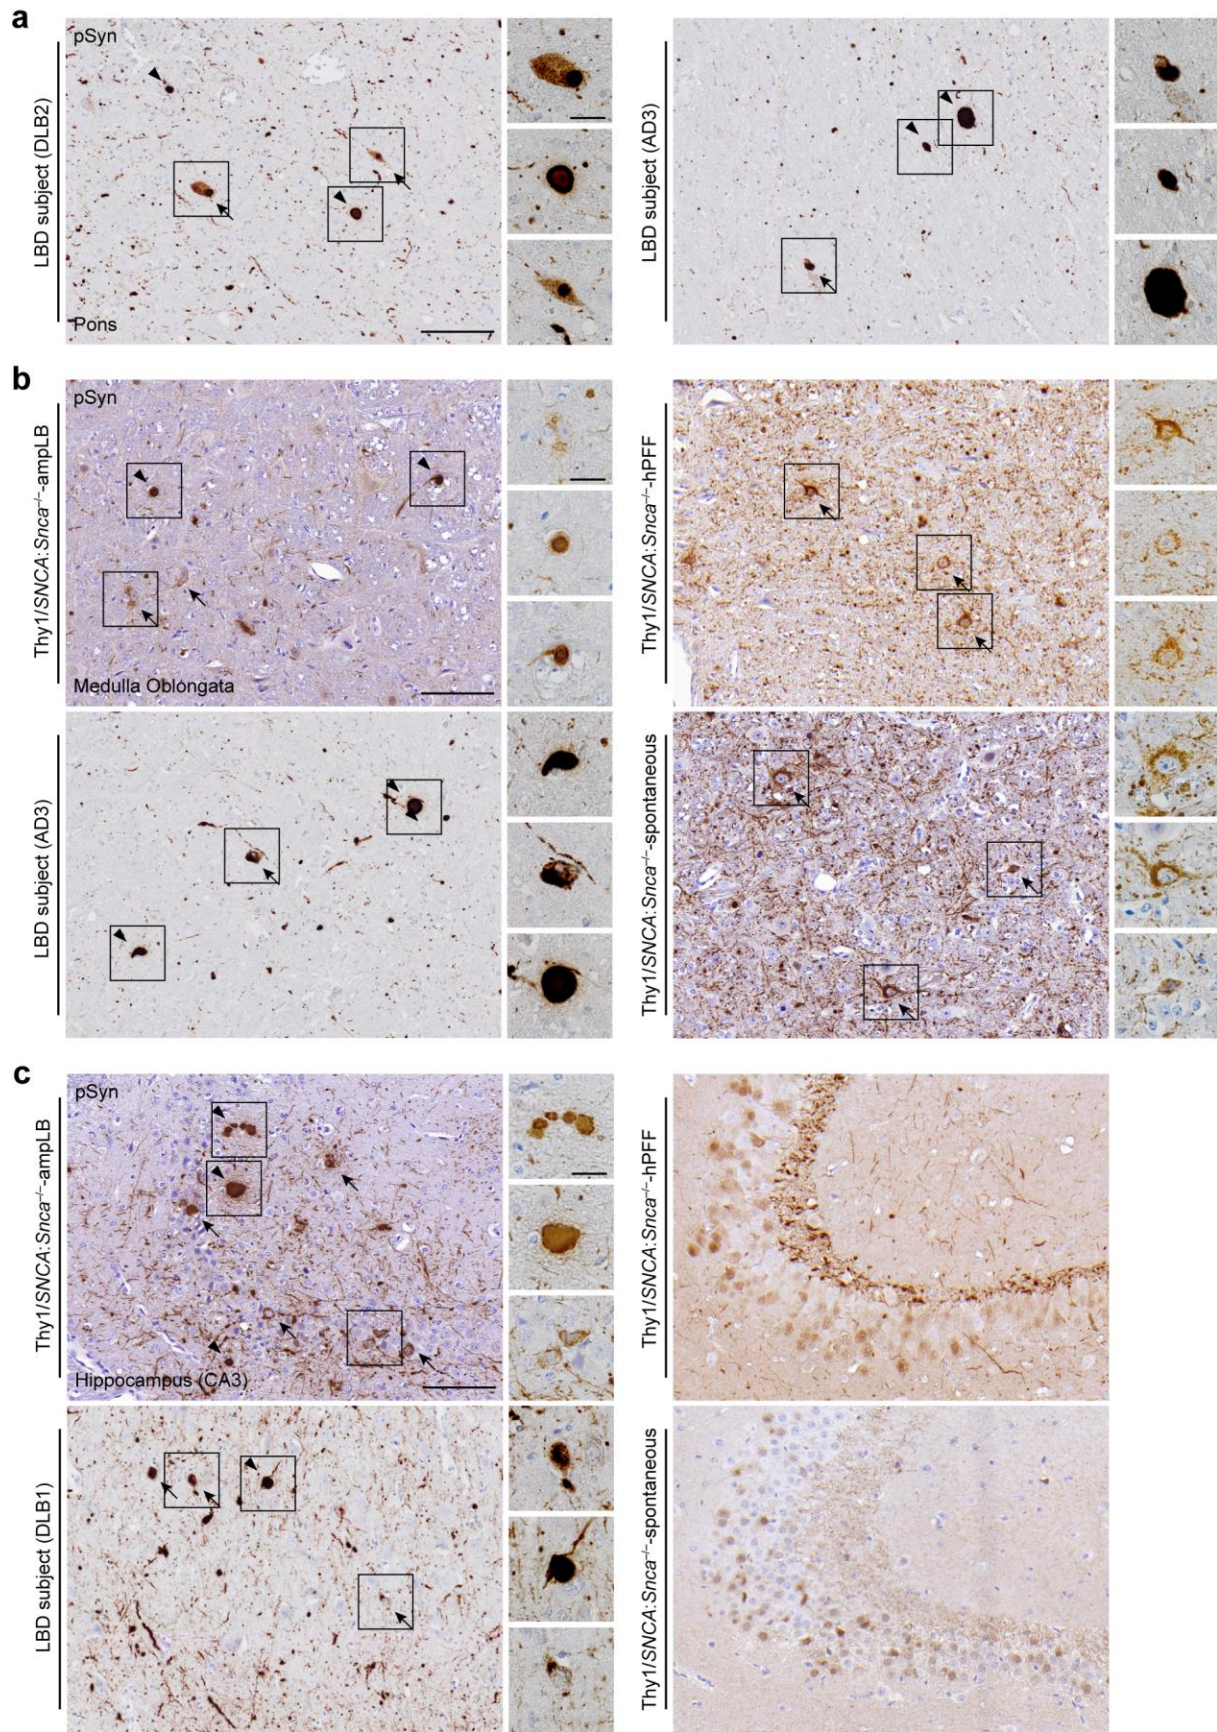

**Supplementary Fig. 7 Similarities and differences in pathological characteristics among Thy1:SNCA/Snca<sup>-/-</sup> mouse models and LBD subjects.** Immunohistochemistry with an anti-pSyn antibody (EP1536Y). **a** Pons pathology of the LBD subjects used for brain extraction. **b, c** Medulla oblongata and hippocampus (CA3) pathology of Thy1:SNCA/Snca<sup>-/-</sup> mouse models and LBD subjects. Arrows and arrowheads indicate pSyn-positive neuronal inclusions and axonal swelling-like structures, respectively. Scale bars 100 μm, 20 μm (inset).

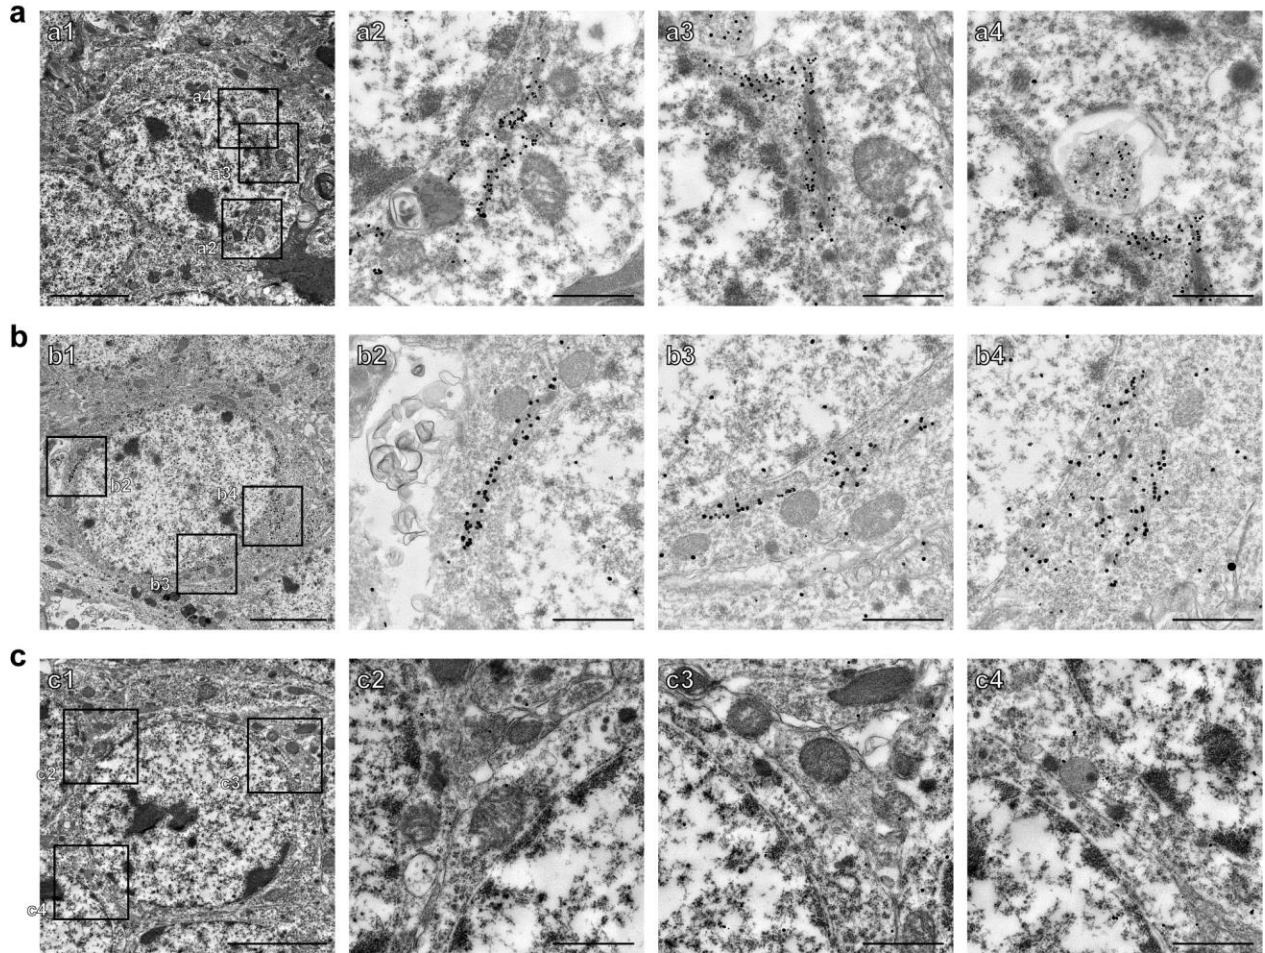

**Supplementary Fig. 8 Immunoelectron microscopy images of neuronal inclusions in ampLB- and hPFF-injected Thy1:SNCA/Snca<sup>-/-</sup> mice.** **a–c** Immunoelectron micrograph of neurons in the DG with immunogold-labeled pSyn (EP1536Y). **a** pSyn-positive neuron in ampLB-injected Thy1:SNCA/Snca<sup>-/-</sup> mice. **b** pSyn-positive neuron in hPFF-injected Thy1:SNCA/Snca<sup>-/-</sup> mice. **c** pSyn-negative neuron in ampLB-injected Thy1:SNCA/Snca<sup>-/-</sup> mice. Bundles of pSyn-positive filamentous structures in the cytosol (**a2**, **a3**, and **b2–4**) and pSyn-positive amorphous structures in an autophagosome-like vacuole (**a4**). Scale bars 5 μm (**a1**, **b1**, and **c1**) and 1 μm (**a2–4**, **b2–4**, **c2–4**).

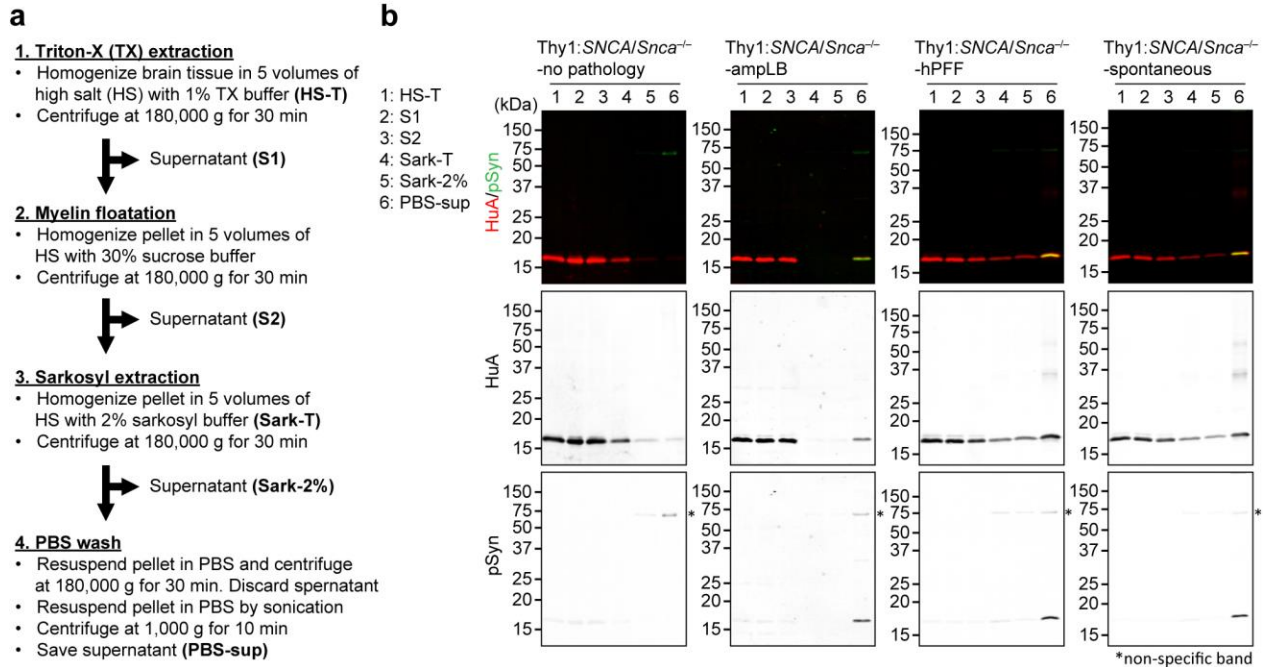

**Supplementary Fig. 9 Biochemical extraction of pathological  $\alpha$ Syn from Thy1:*SNCA/Snca*<sup>-/-</sup> mouse brains.** **a** Brief description of the mouse brain extraction protocol. **b** Western blot analysis of brain lysates of Thy1:*SNCA/Snca*<sup>-/-</sup> mice without  $\alpha$ Syn pathology (Thy1:*SNCA/Snca*<sup>-/-</sup>-no pathology), ampLB-injected Thy1:*SNCA/Snca*<sup>-/-</sup> mice (Thy1:*SNCA/Snca*<sup>-/-</sup>-ampLB), hPFF-injected Thy1:*SNCA/Snca*<sup>-/-</sup> mice (Thy1:*SNCA/Snca*<sup>-/-</sup>-hPFF), and Thy1:*SNCA/Snca*<sup>-/-</sup> mice with spontaneous  $\alpha$ Syn pathology (Thy1:*SNCA/Snca*<sup>-/-</sup>-spontaneous). Samples containing 10  $\mu$ g of total protein was loaded to each lane. Immunoblots with anti-human  $\alpha$ Syn (HuA) and pSyn (81A) antibodies. Images are representative of three independent experiments. Source data are provided as a Source Data file.

**Supplementary Table 1. Clinical information.** Clinical information of the cases used for the extraction of pathological  $\alpha$ Syn and immunohistochemistry.

| <b>For extraction of pathological <math>\alpha</math>Syn</b> |                             |                     |                |
|--------------------------------------------------------------|-----------------------------|---------------------|----------------|
| <b>Case</b>                                                  | <b>Age of Disease Onset</b> | <b>Age at Death</b> | <b>PMI (h)</b> |
| AD1                                                          | 68                          | 74                  | 19             |
| AD2                                                          | 64                          | 72                  | 8              |
| AD3                                                          | 59                          | 70                  | 18             |
| PDD1                                                         | 60                          | 72                  | 19             |
| PDD2                                                         | 72                          | 79                  | 6              |
| PDD3                                                         | 42                          | 59                  | 10             |
| PDD4                                                         | 44                          | 73                  | 30             |
| PDD5                                                         | 53                          | 75                  | 6              |
| DLB1                                                         | 78                          | 83                  | 9              |
| DLB2                                                         | 53                          | 63                  | 9              |
| Control                                                      | -                           | 62                  | 16             |

| <b>For immunohistochemistry shown in Fig. 6</b> |                             |                     |                |
|-------------------------------------------------|-----------------------------|---------------------|----------------|
| <b>Case</b>                                     | <b>Age of Disease Onset</b> | <b>Age at Death</b> | <b>PMI (h)</b> |
| LBD                                             | 59                          | 76                  | 18.5           |



**Supplementary Table 2. Biochemical information for sarkosyl-insoluble fractions of LBD brain extractions.**

| Case    | Brain region used    | Total protein ( $\mu\text{g}/\mu\text{l}$ ) | $\alpha\text{Syn}$ ( $\text{ng}/\mu\text{l}$ ) | Used for                                                               |
|---------|----------------------|---------------------------------------------|------------------------------------------------|------------------------------------------------------------------------|
| AD1     | Middle Frontal Gyrus | 14.6                                        | 43                                             | AmpLB injection into WT mice                                           |
| AD2     | Middle Frontal Gyrus | 8.5                                         | 58                                             | AmpLB injection into WT mice                                           |
| AD3     | Middle Frontal Gyrus | 13.5                                        | 144                                            | AmpLB injection into Thy1: <i>SNCA/Snca</i> <sup>-/-</sup> mice        |
| PDD1    | Middle Frontal Gyrus | 9.3                                         | 95                                             | AmpLB injection into WT and Thy1: <i>SNCA/Snca</i> <sup>-/-</sup> mice |
| PDD2    | Middle Frontal Gyrus | 7.6                                         | 36                                             | AmpLB injection into WT mice                                           |
| PDD3    | Middle Frontal Gyrus | 17.5                                        | 68                                             | Brain lysate injection into WT mice                                    |
| PDD4    | Middle Frontal Gyrus | 24                                          | 20                                             | Transduction into mouse primary hippocampal neurons                    |
| PDD5    | Middle Frontal Gyrus | 17.5                                        | 19                                             | Transduction into mouse primary hippocampal neurons                    |
| DLB1    | Middle Frontal Gyrus | 7.2                                         | 12                                             | AmpLB injection into WT mice                                           |
| DLB2i   | Middle Frontal Gyrus | 14.9                                        | 20                                             | AmpLB injection into WT mice                                           |
| DLB2ii  | Middle Frontal Gyrus | 8.8                                         | 140                                            | AmpLB injection into Thy1: <i>SNCA/Snca</i> <sup>-/-</sup> mice        |
| Control | Middle Frontal Gyrus | 4.8                                         | N.D.                                           | Brain lysate injection into WT mice                                    |

N.D., not determined.

**Supplementary Table 3. Biochemical information for sarkosyl-insoluble fractions of Thy1/SynKO mouse brain extractions.**

| <b>Mice</b>                                            | <b>Total protein<br/>(<math>\mu\text{g}/\mu\text{l}</math>)</b> | <b><math>\alpha\text{Syn}</math><br/>(<math>\text{ng}/\mu\text{l}</math>)</b> |
|--------------------------------------------------------|-----------------------------------------------------------------|-------------------------------------------------------------------------------|
| Thy1: <i>SNCA/Snca</i> <sup>-/-</sup> -ampLB(PDD1)-1   | 5.11                                                            | 15.0                                                                          |
| Thy1: <i>SNCA/Snca</i> <sup>-/-</sup> -ampLB(PDD1)-2   | 3.26                                                            | 6.32                                                                          |
| Thy1: <i>SNCA/Snca</i> <sup>-/-</sup> -ampLB(DLB2ii)-1 | 3.75                                                            | 10.2                                                                          |
| Thy1: <i>SNCA/Snca</i> <sup>-/-</sup> -ampLB(DLB2ii)-2 | 5.55                                                            | 15.85                                                                         |
| Thy1: <i>SNCA/Snca</i> <sup>-/-</sup> -hPFF-1          | 4.21                                                            | 40.0                                                                          |
| Thy1: <i>SNCA/Snca</i> <sup>-/-</sup> -hPFF-2          | 2.49                                                            | 65.0                                                                          |
| Thy1: <i>SNCA/Snca</i> <sup>-/-</sup> -spontaneous-1   | 1.68                                                            | 26.8                                                                          |
| Thy1: <i>SNCA/Snca</i> <sup>-/-</sup> -spontaneous-2   | 4.25                                                            | 53.5                                                                          |
| Thy1: <i>SNCA/Snca</i> <sup>-/-</sup> -no pathology    | 4.18                                                            | 1.57                                                                          |
